# Supplementary material for: Understanding neighbourhood retail food environmental mechanisms influencing BMI in the Caribbean: a multilevel analysis from the Jamaica Health and Lifestyle Survey: a cross-sectional study
Source: PubMed Central journal article supplement — BMJ Open. 2020 Aug 23;10(8):e033839. doi: 10.1136/bmjopen-2019-033839 (PMC7445353; doi:10.1136/bmjopen-2019-033839), 2020-08-23
Supplement: bmjopen-2019-033839supp001.pdf [file bmjopen-2019-033839supp001.pdf]

**Supplementary Table.** Proportion of zero-valued observations for geographic variables

| <b>Retail Food Environments</b>        | <b>Frequency (%)</b> |
|----------------------------------------|----------------------|
|                                        | <b>N=2527</b>        |
| Supermarkets/markets proximity (km)    | 0                    |
| Supermarkets/markets / km <sup>2</sup> | 61.30                |
| Supermarkets/markets /1000 people/ ED  | 92.13                |
| FFO proximity (km)                     | 0                    |
| FFO / km <sup>2</sup>                  | 68.22                |
| FFO / 1000 people/ ED                  | 94.46                |

ED – Enumeration District; FFO - Fast Food Outlets
